# Supplementary material for: Solid polymer electrolytes reinforced with porous polypropylene separators for all-solid-state supercapacitors
Source: Royal Society of Chemistry journal article supplement (doi:10.1039/d3ra05899a), 2023-01-01
Supplement: d3ra05899a1.pdf [file d3ra05899a1.pdf]

## Electronic Supplementary Information

### Solid polymer electrolytes reinforced with porous polypropylene separators for all-solid-state supercapacitors

Weidong Liu <sup>a,b</sup>, Zhiyun Li <sup>a,b</sup>, Fang Pan <sup>a,b</sup>, Qingyi He <sup>c</sup>, Qiushi Zhang <sup>a,b\*</sup>

<sup>a</sup> College of Automotive Engineering, Jilin University, Changchun 130025, China

<sup>b</sup> State Key Laboratory of Automotive Simulation and Control, Jilin University, Changchun 130012, China

<sup>c</sup> Feynman Technology (Qingdao) Co., Ltd., Qingdao 266000, China

\* Correspondence: [qs Zhang@jlu.edu.cn](mailto:qs Zhang@jlu.edu.cn)

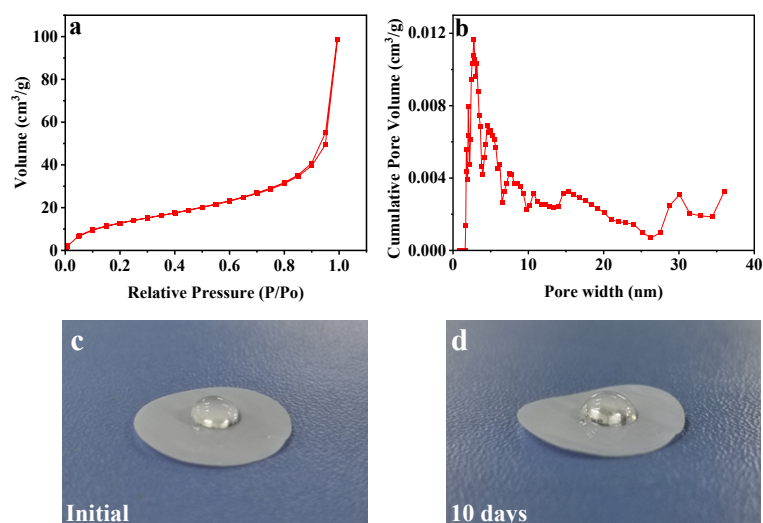

Fig. S1 Adsorption-desorption isotherms of PP separator (a) and corresponding pore size distribution (b); Initial state (c) and state after 10 days (d) of IL drop on PP separator.

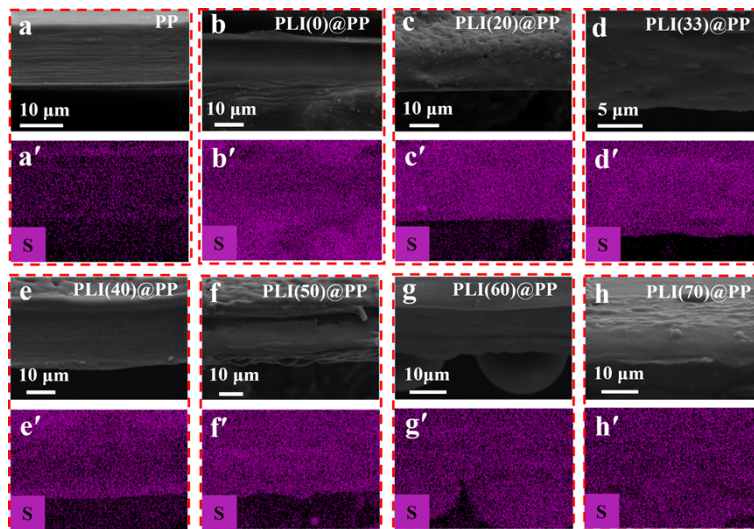

Fig. S2 PLI(x)@PP cross-section SEM images (a-h) and element sulfur (S) distribution EDS images (a'-h')

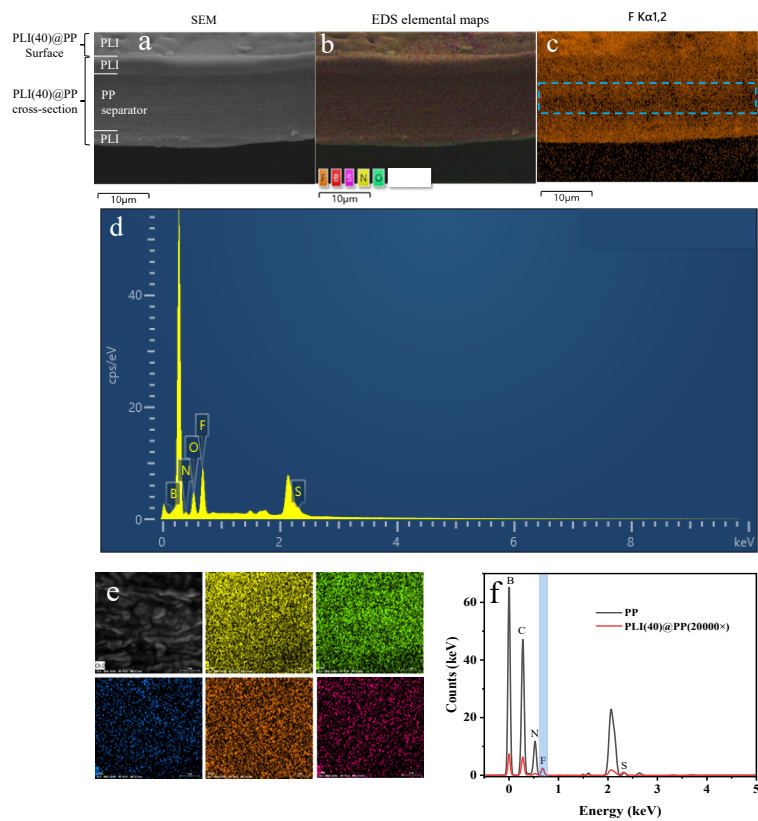

Fig. S3 PLI(40)@PP cross-section SEM images (a), element distribution EDS images (b) and energy spectrum distribution map (c) EDS elemental maps of F, (d) EDS spectra of N, B, F, O and S elements, and (e-f) EDS test of the internal PP separator of PLI(40)@PP cross-section and PP.

Table S1 Melting temperature ( $T_m$ ), melting enthalpy ( $\Delta H$ ), and crystallinity ( $X_c$ ) of PEO and PLI(x).

| Sample  | $T_m$ (°C) | $\Delta H$ (J g <sup>-1</sup> ) | $X_c$ (%) |
|---------|------------|---------------------------------|-----------|
| PEO     | 70.9       | 163.7                           | 76.6      |
| PLI(0)  | 57.3       | 66.0                            | 30.9      |
| PLI(20) | 52.6       | 49.0                            | 22.9      |
| PLI(33) | 49.2       | 38.6                            | 18.1      |
| PLI(40) | 49.0       | 37.4                            | 17.5      |
| PLI(50) | 45.7       | 34.5                            | 16.1      |
| PLI(60) | 44.8       | 25.8                            | 12.1      |
| PLI(70) | 43.1       | 21.6                            | 10.1      |

Table S2 Comparison of specific capacitance between supercapacitors in this paper and other supercapacitors using all solid-state polymer electrolytes.

| Electrode  | Electrolyte                             | $C_{sp}/F\ g^{-1}$ | Ref.      |
|------------|-----------------------------------------|--------------------|-----------|
| AC         | PEO/FPC /IL                             | 70.8               | [S1]      |
| AC/GR      | PEO/PPO/IL                              | 112.3              | [S2]      |
| AC         | PEO/NaI/IL                              | 95                 | [S3]      |
| AC + MWCNT | PVDF-HFP<br>/[PMpyr][NTf <sub>2</sub> ] | 156.6              | [S4]      |
| AC         | PVDF-HFP /IL/KI                         | 100                | [S5]      |
| AC         | PLI (70)@PP                             | 158                | This work |

poly(VA-co-AN): poly(vinyl alcohol-co-acrylonitrile), FPC: non-woven cellulose separator, GR: Graphene, PPO: poly(propylene oxide), PVDF-HFP: Poly(vinylidene fluoride-co-hexafluoropropylene) polymer, PVA: poly(vinyl alcohol)

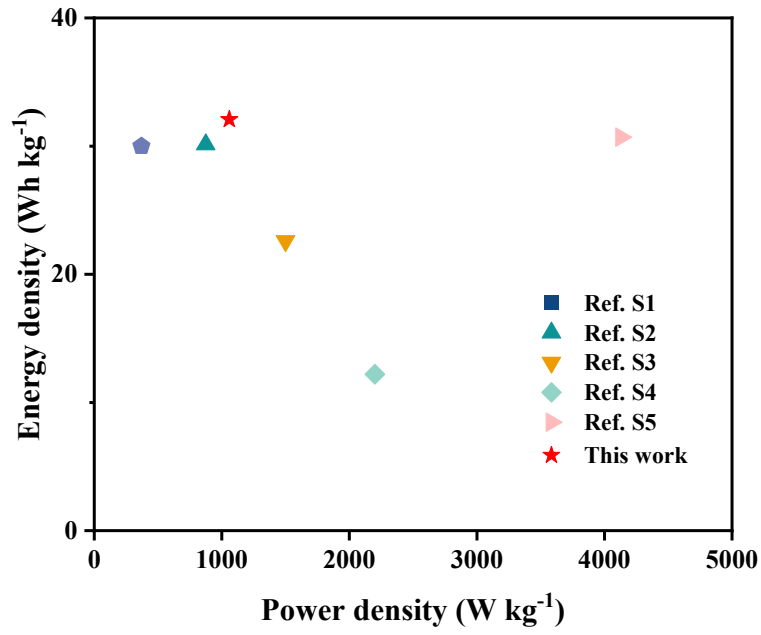

Fig. S4 Ragone plot of the CE/PLI(70)@PP/CE and literature data.

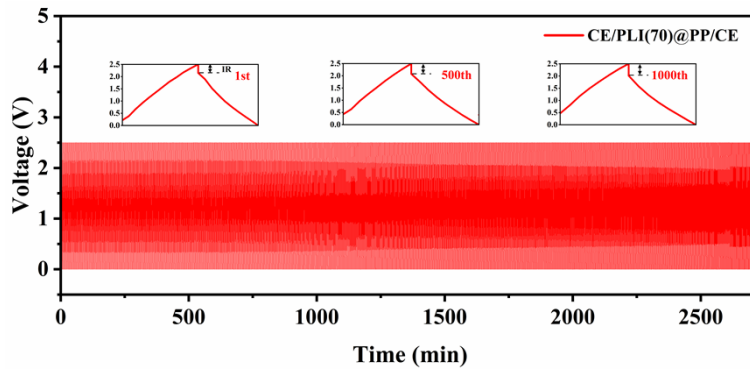

Fig. S5 One thousand charge–discharge cycles of the CE/PLI(70)@PP/CE at a 1 A g<sup>-1</sup> current density.

Fig. S6 (a) EIS curves of CE/PLI(70)@PP/CE and CE/PLI(70)/CE before and after cycling; (b) the EDS test of the internal PP separator of PLI(70)@PP cross-section before cycling and after 1000 cycles.

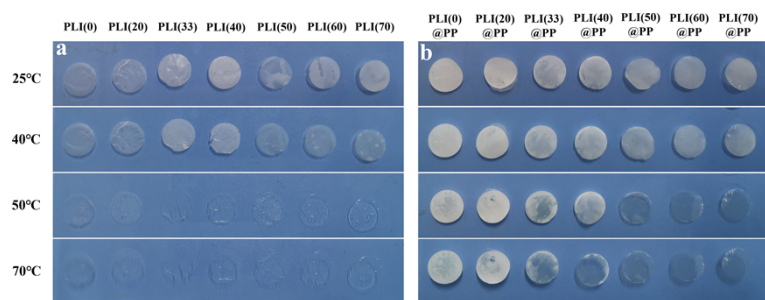

Fig. S7 Images of PLI (x) (a) and PLI (x)@PP (b) after dimensional stability test at different temperatures (25-70°C).

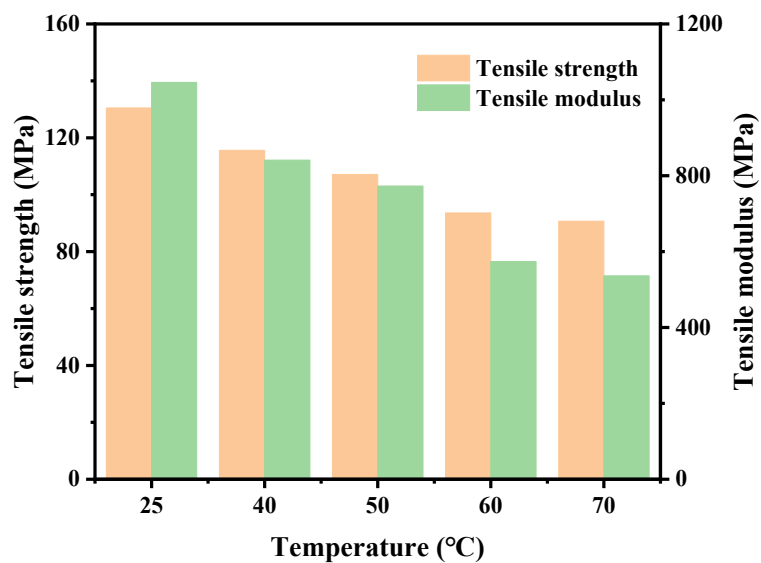

Fig. S8 The tensile strength and modulus of PLI(70)@PP at 25-70°C.

## Reference

- [S1] X. Zhong, J. Tang, L. Cao, W. Kong, Z. Sun, H. Cheng, Z. Lu, H. Pan, B. Xu, Cross-linking of polymer and ionic liquid as high-performance gel electrolyte for flexible solid-state supercapacitors, *Electrochim. Acta*, 2017, **244** 112-118.
- [S2] J.H. Han, J.Y. Lee, D.H. Suh, Y.T. Hong, T.-H. Kim, Electrode-Impregnable and Cross-Linkable Poly(ethylene oxide)–Poly(propylene oxide)–Poly(ethylene oxide) Triblock Polymer Electrolytes with High Ionic Conductivity and a Large Voltage Window for Flexible Solid-State Supercapacitors, *ACS Appl. Mater. Interfaces*, 2017, **9**, 33913-33924.
- [S3] A. Singh, P.S. Dhapola, S. Kumar, S. Konwar, P.K. Singh, A.M.M. Ali, D. Agarwal, D. Singh, K. Strzałkowski, M.Z.A. Yahya, S.V. Saviolov, B. Joshi, Highly conducting ionic liquid doped polymer electrolyte for energy storage applications, *J. Sci.: Adv. Mater. Devices*, 2022, **7**, 100511.
- [S4] Muchakayala, Ravi, Song, Shenhua, Wang, Jingwei, Fan, Youhua, Benggeppagari, Manjunatha, Development and supercapacitor application of ionic liquid-incorporated gel polymer electrolyte films, *J. Ind. and Eng. Chem.*, 2018, **59**, 79-89.
- [S5] N. Yadav, S.A. Hashmi, A.A. Hor, High energy density carbon supercapacitor with ionic liquid-based gel polymer electrolyte: Role of redox-additive potassium iodide, *J. Energy Storage*, 2022, **47**, 103608.
